# Supplementary material
Source: publisher figshare collection journal article supplement (https://sage.figshare.com/ndownloader/files/22014780)
Supplement: Supplementary file 1 [file 22014780]

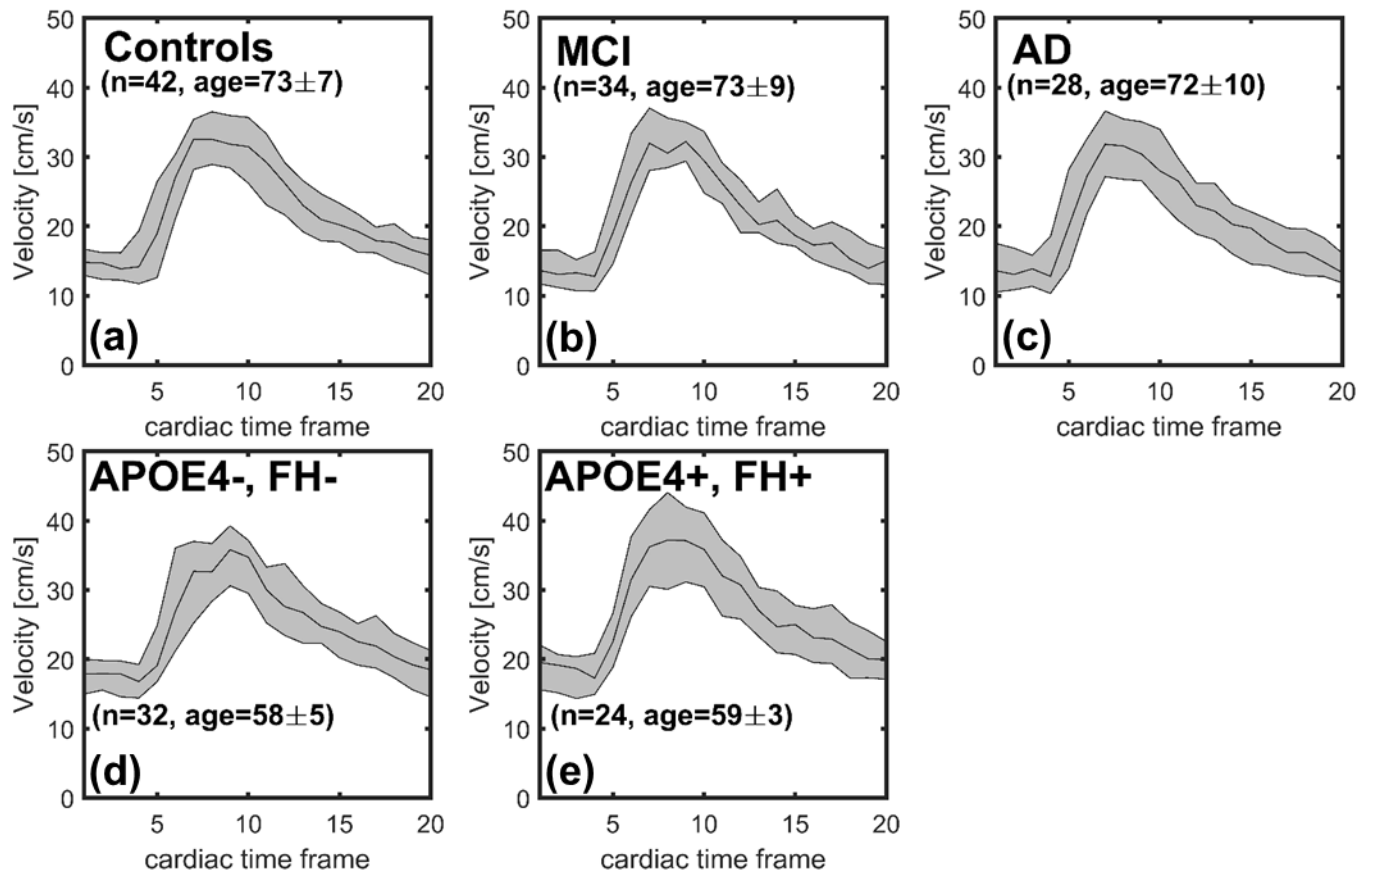

**Supplementary figure 1:** Mean velocity curves derived from age-matched controls (a), mild cognitively impaired (MCI) (b), Alzheimer's disease (c), APOE4-, FH- (d), and APOE4+, FH+ (e) subjects. These curves were used to estimate blood flow and flow pulsatility index.
